# Supplementary material for: Nano-beam X-ray microscopy of dried colloidal films
Source: Royal Society of Chemistry journal article supplement (doi:10.1039/c5sm00609k), 2015-01-01
Supplement: c5sm00609k1.pdf [file c5sm00609k1.pdf]

## Electronic Supplemental Information

### Part 1 – Angular cross-correlation

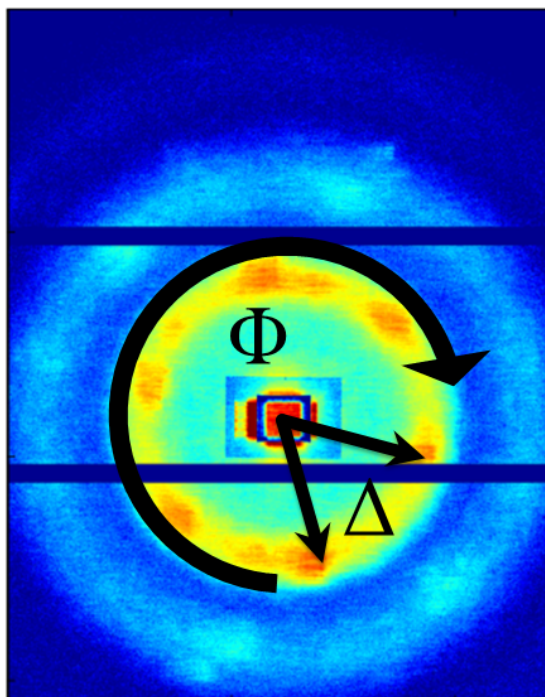

SI-1: Definition of the angular cross-correlation.  $\Phi$  denotes the azimuthal angle and  $\Delta$  the angle between two points on a scattering intensity annulus.

Fig. SI-1 shows a typical two-dimensional scattering pattern. The definition of the angular cross-correlation function for such a pattern at fixed wave vector transfer  $Q$  is [1,2]:

$$C(Q,\Delta) = \frac{\langle I(Q,\Phi)I(Q,\Phi + \Delta) \rangle_{\Phi} - \langle I(Q,\Phi) \rangle_{\Phi}^2}{\langle I(Q,\Phi) \rangle_{\Phi}^2}. \quad (SI1)$$

Herein,  $\Delta$  denotes the angle between two points on an intensity annulus  $I(Q)$  with radius  $Q$ . For these the cross-correlation is computed by taking the product of all points at given angle  $\Phi$  on the annulus that are separated by  $\Delta$ .  $\langle \cdot \rangle_{\Phi}$  denotes the angular average over such an annulus.

## Part 2 – Superlattice structures AB<sub>2</sub> and AB<sub>13</sub>

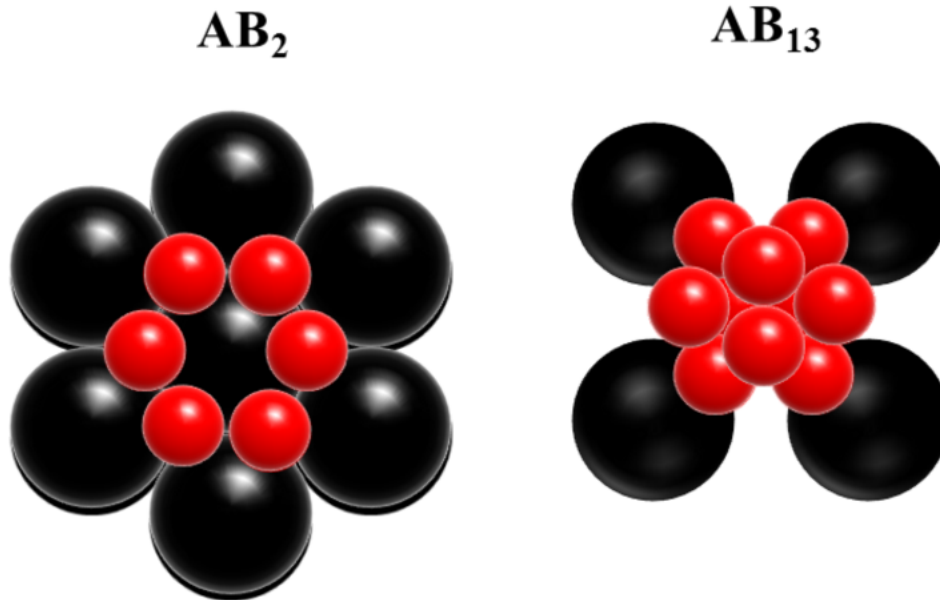

SI-2 – AB<sub>2</sub> structure and AB<sub>13</sub> structure.

Binary mixtures of colloids can form crystals with superlattice structures. Common superlattice structures are the AB<sub>2</sub> and AB<sub>13</sub> structures (Fig. SI-2). 'A' denotes the large particle species, 'B' the small one.

The hexagonal AB<sub>2</sub> structure consists of a hexagonal closed packing of large particles. The small particles form planar rings filling the holes between the larger particles [3].

In the AB<sub>13</sub> structure, the large particles form a simple cubic structure. Within this cube, a body-centered small particle is located which is surrounded by 12 other small particles in an icosahedral structure [3].

The stability of these superlattices depends on the radius ratio  $\alpha$ . For  $0.425 < \alpha < 0.60$ , the AB<sub>2</sub> structure is stable, and for  $0.485 < \alpha < 0.62$ , the AB<sub>13</sub> structure is stable [4]. As the radius ratio of the silica particles used was  $\alpha = 0.58$ , both structure are expected to be present within the colloidal film.

### Part 3 – Results of a binary colloid film with $X = 0.89$

In the following the scanning SAXS and XCCM results on a dried colloidal film with particle size ratio  $\alpha = 0.58$  and mixing ratio  $X = 0.89$  are presented. The experimental conditions were the same as described in the main part.

#### Part 3.1 – Intensity maps for $X = 0.89$

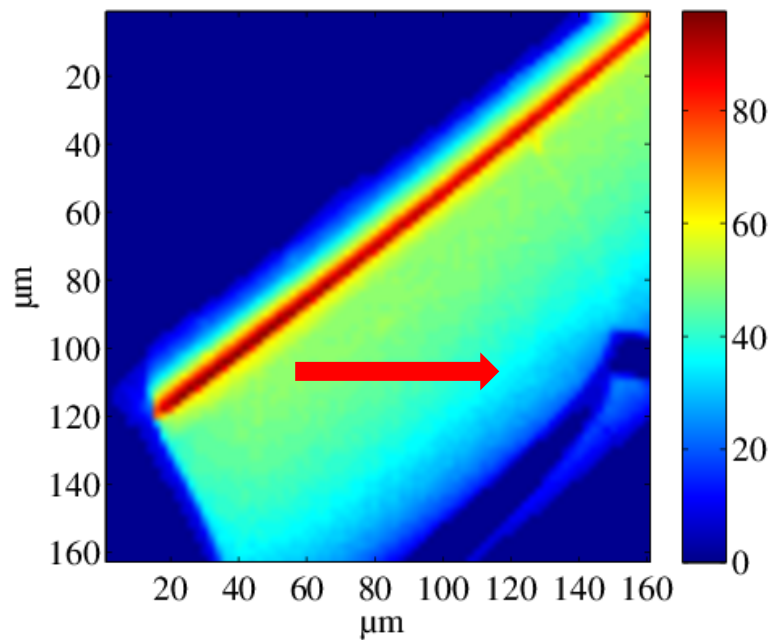

SI-3 – Intensity map for  $X= 0.89$ ,  $Q_1$ .

Fig. SI-3 shows the scanning map of the scattering intensity of the  $Q_1$  – partition. Clearly visible are the sharp edges of the dried colloidal film. The strongest scattering intensity is detected for a pronounced stripe in the upper part close to the edge of the film. In contrast, for the region below a continuous reduction of the scattering intensity is present. This points towards a particle density gradient in the film (indicated by the red arrow).

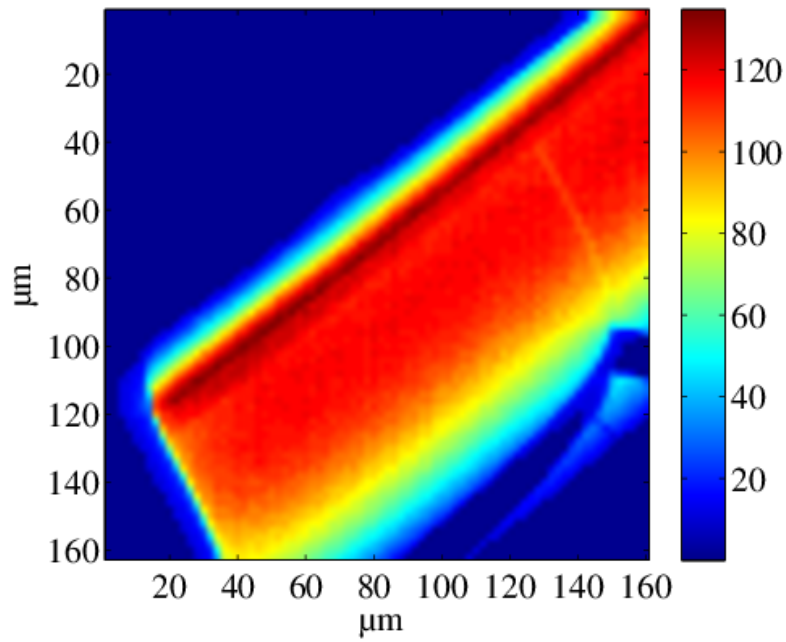

SI-4 – Intensity map for  $X= 0.89, Q_2$ .

Compared to the  $Q_1$  - partition, the scattering intensity of the  $Q_2$  – partition (Fig. SI-4) is in general stronger because the small particle species is dominating within the sample. In contrast to the intensity map at  $Q_1$ , the intensity gradient is weaker in the film. This suggests that the large silica particles are mainly contained in the stripe-like region close to the upper film edge. The small particles are distributed everywhere in the film. Thus, for this sample particle segregation within the drying process took place.

### Part 3.2 – Cross-correlation maps for $X = 0.89$

Figures SI-5 to SI-10 display the XCCM maps for  $l = 2, 4$  and  $6$  for both  $Q$ -partitions. As for the  $X = 0.66$  sample, a strong  $l = 2$  contribution is present at the film edge at  $Q_1$ . For the other parts of this film, the  $l = 4$  contribution is stronger than the  $l = 2$  contribution. The region where the large particle species is more dominantly present, i.e. the stripe region, has a reduced four-fold order compared to the other parts of the sample. Notable is one ordered region containing only the large particles (Fig. SI-5 to SI-7 in the upper right corner).

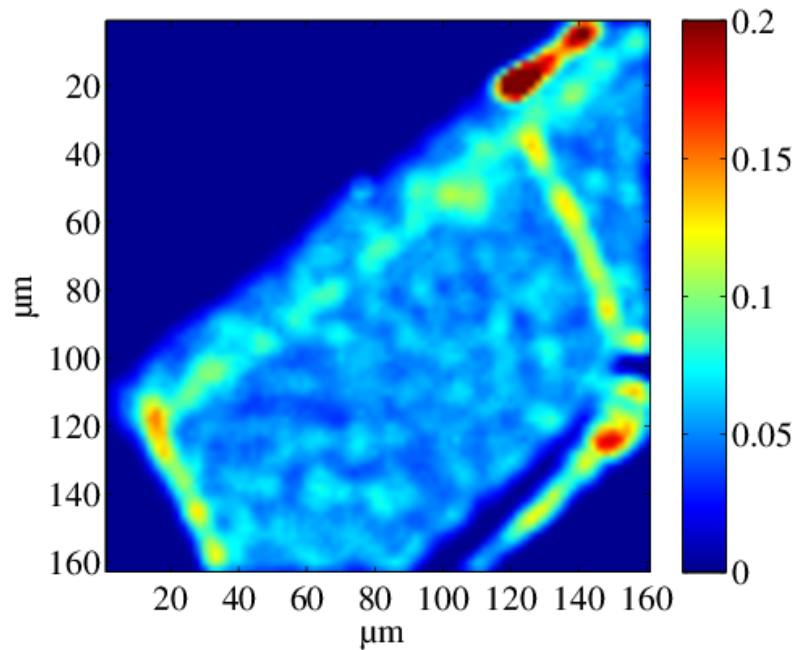

SI-5 – XCCM map  $Q_1, l = 2$ .

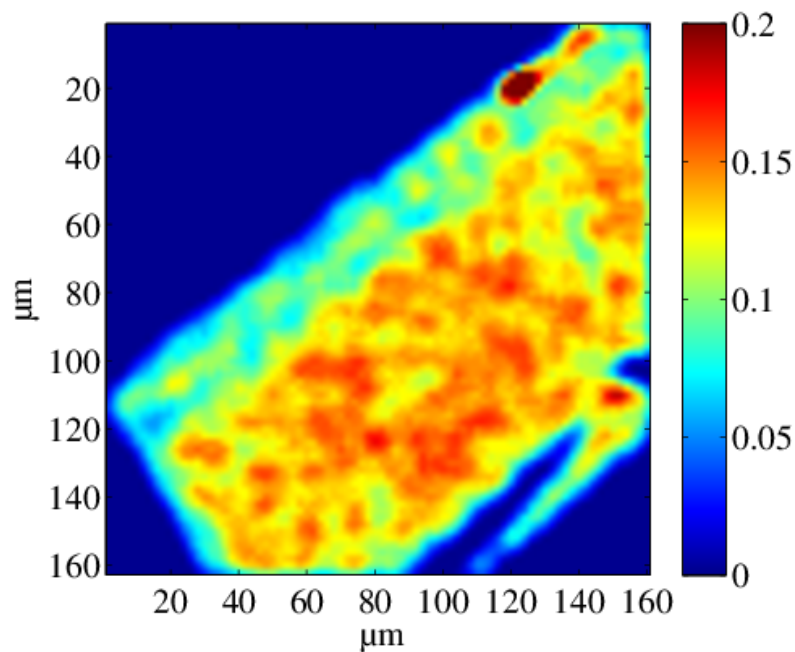

SI-6 – XCCM map  $Q_1, l = 4$ .

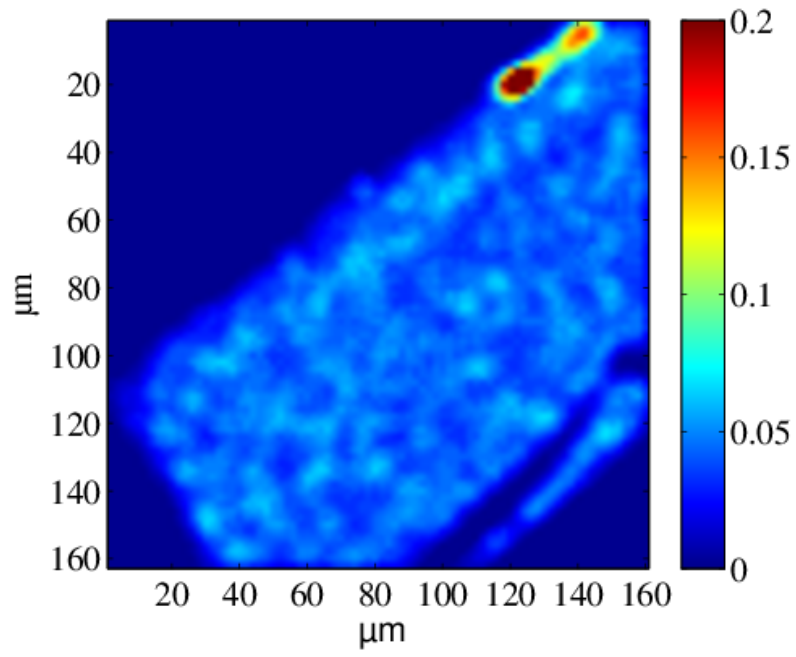

SI-7 – XCCM map  $Q_1, l = 6$ .

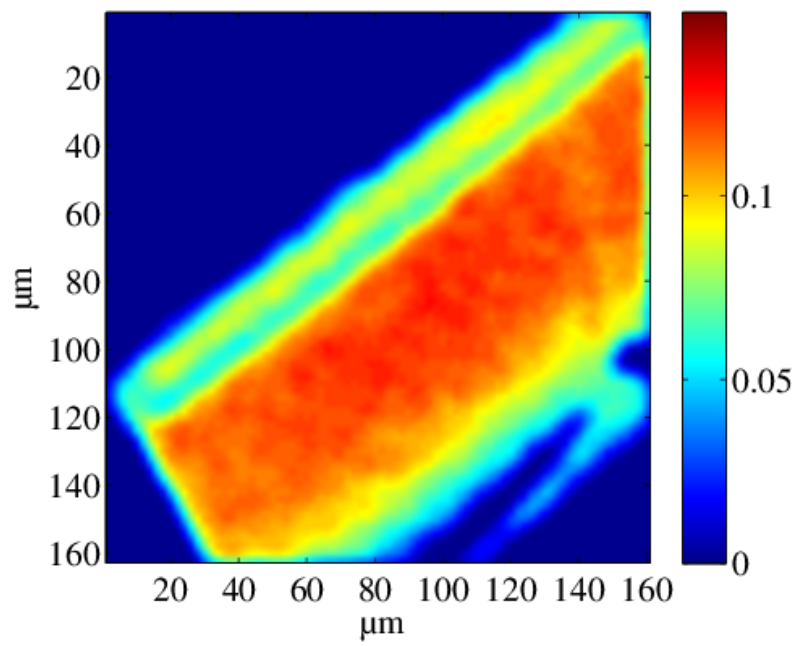

SI-8 – XCCM map  $Q_2, l = 2$ .

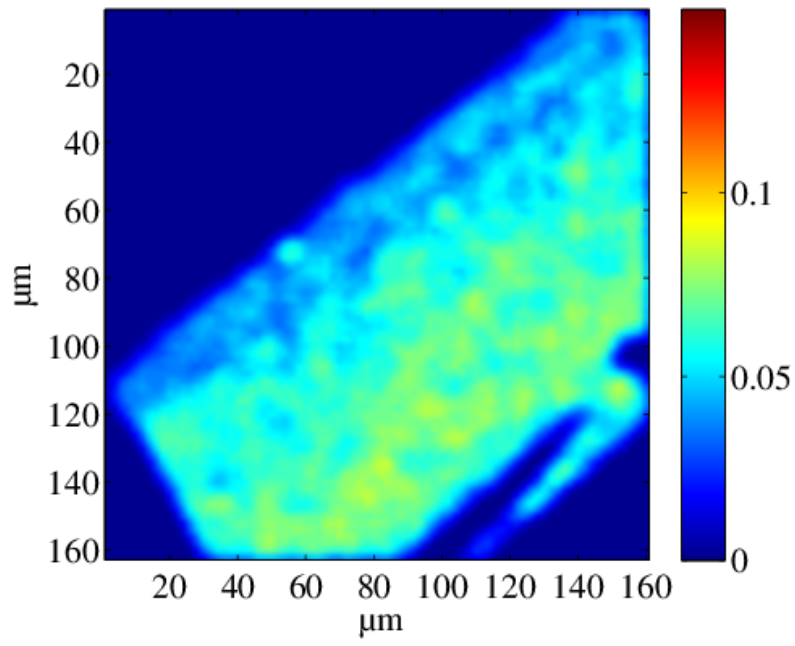

SI-9 – XCCM map  $Q_2$ ,  $l = 4$ .

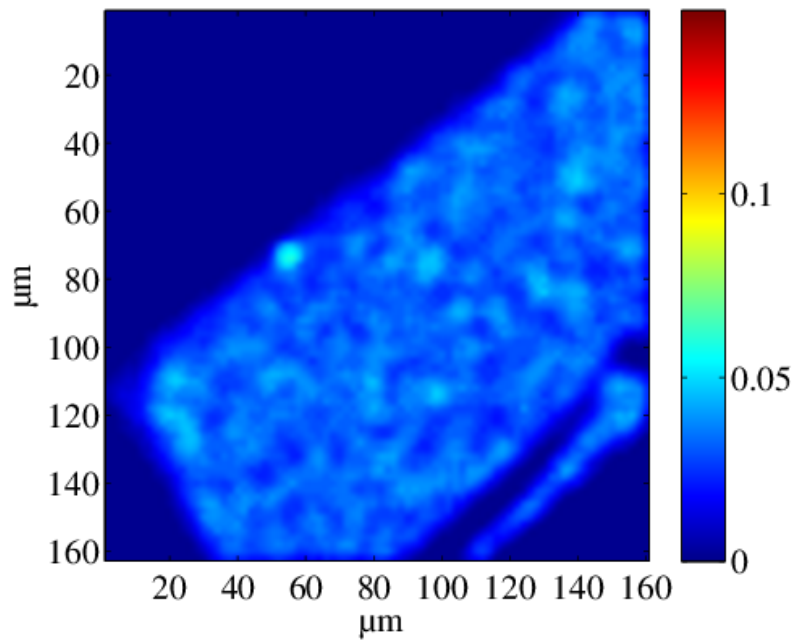

SI-10 – XCCM map  $Q_2$ ,  $l = 6$ .

### Part 3.3 – Map sections for $X = 0.89$

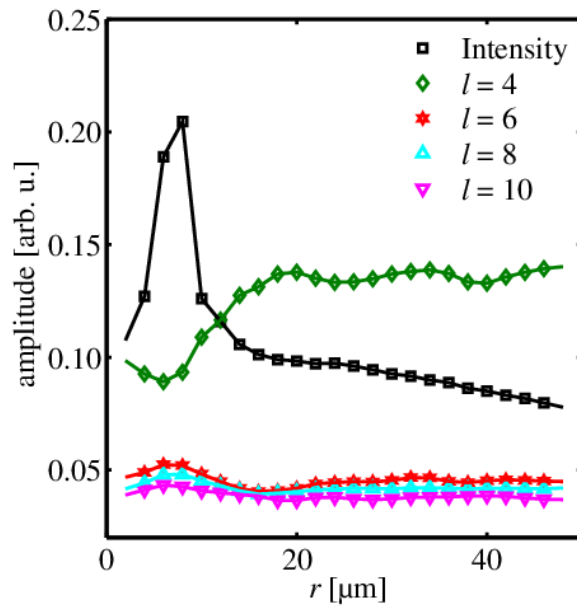

SI-11 – Map section for  $Q_1$ . The  $l = 2$  component, being only an indicator for the film edges, is not shown.

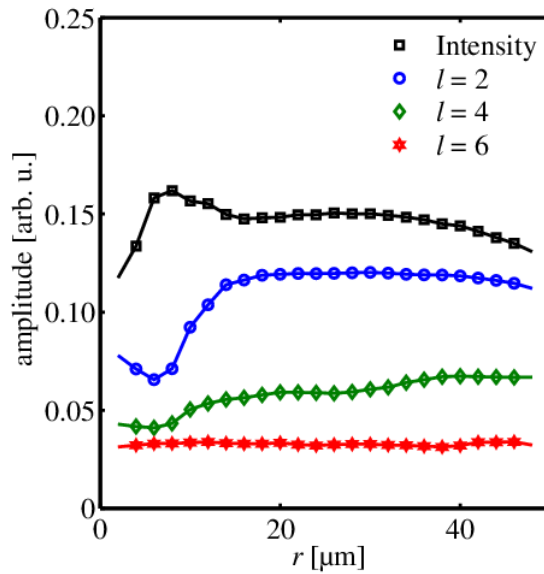

SI-12 – Map section for  $Q_2$ .

Fig. SI-11 and SI-12 show the results of the sections of the intensity and XCCM maps for both  $Q$ -partitions along the red arrow (see Fig. SI-3) averaging along the full film size. For  $Q_1$  the pronounced stripe as well as the decreasing particle density are visible from the intensity curve. In case of the cut for the  $Q_2$  map, the scattering intensity is neither that strong at the stripe region nor is the particle gradient that strong indicating a more homogenous distribution of small particles.



For the  $Q_1$ -partition the  $l = 4$  contribution is the most dominant Fourier component. It is reduced in the stripe-region indicating a reduced order due to the high fraction of large silica particles. The  $l = 4$  curve is nearly constant along the other part of the film for  $Q_1$ . The other Fourier components studied, i.e.  $l = 6-10$ , have reduced amplitudes of similar values and show small maxima at both the stripe region and within the small particle region.

In contrast, for the  $Q_2$  map the  $l = 2$  Fourier component is the strongest component. It exhibits a minimum in the stripe region and is nearly constant within the other part of the film. The  $l = 4$  component has a smaller amplitude but a similar shape. The  $l = 6$  component is nearly constant. This finding is similar to that for the film with  $X = 0.66$ .

## References

- [1] P. Wochner, C. Gutt, T. Autenrieth, T. Demmer, V. Bugaev, A. D. Ortiz, A. Duri, F. Zontone, G. Grübel, and H. Dosch, *Proc. Natl. Acad. USA* **106**, 11511 (2009).
- [2] M. Altarelli, R. P. Kurta, and I. A. Vartanyants, *Phys. Rev. B* **82**, 10 (2010).
- [3] M.J. Murray and J.V. Sanders, *Philos. Mag. A* **42**, 721 (1980).
- [4] A.B. Schofield, P.N. Pusey, and P. Radcliffe, *Phys. Rev. E* **72**, 031407 (2005).
